# Supplementary material for: Sex-dependent factors encoded in the immune compartment dictate relapsing or progressive phenotype in demyelinating disease
Source: JCI journal article supplement (doi:10.1172/jci.insight.124885), 2019-03-21
Supplement: sd1 [file 1]

## SUPPLEMENTAL TABLES FIGURES AND FIGURE LEGENDS

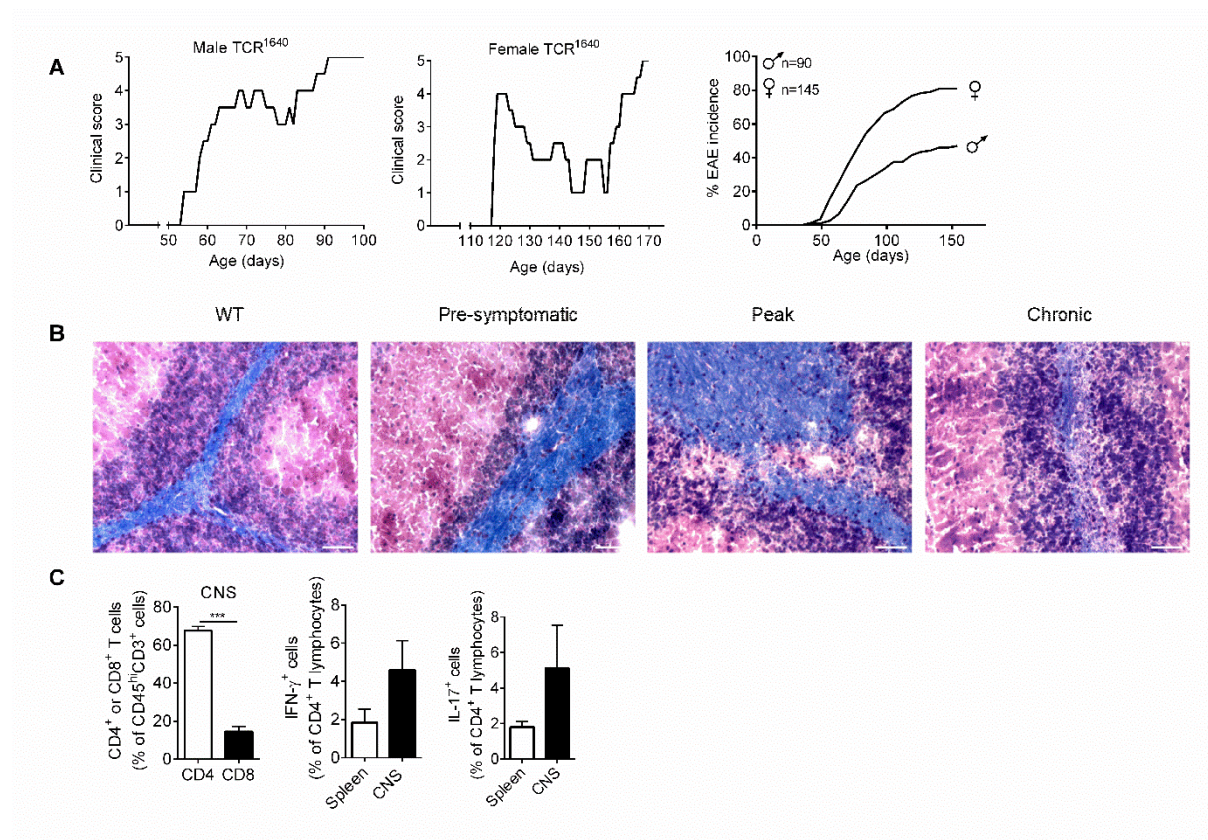

**Supplemental Figure 1. Characterization and validation of the TCR<sup>1640</sup> mouse model.** (A) A total of 90 male mice were followed up and an average of 40% developed a primary progressive EAE disease. A representative example is shown here (left graph). A total of 146 female mice were followed up and 80% of the females developed a RR form of the EAE disease. A representative example is shown here (middle graph). Incidence of EAE disease in female and male TCR<sup>1640</sup> mice (right graph). (B) Luxol fast blue staining combined with hematoxylin and eosin to analyze demyelination and immune cell infiltration in SJL/j wild-type mice and TCR<sup>1640</sup> mouse at pre-symptomatic, peak and chronic phase of the disease. (C) Cellular infiltrates into the central nervous system (CNS) of sick (score  $\geq 3$ ) TCR<sup>1640</sup> mice undergoing spontaneous EAE are composed of CD4<sup>+</sup> T lymphocytes that have a T<sub>H1</sub>/T<sub>H17</sub> cytokine expression. Data are representative of at least 3 sick TCR<sup>1640</sup> mice, analyzed in 3 independent experiments. Data are represented as mean  $\pm$  SEM and an one-side unpaired t-test was used with \*\*\* p<0.001. Scale bar: 100  $\mu$ m. A p-value less than 0,05 was considered significant.



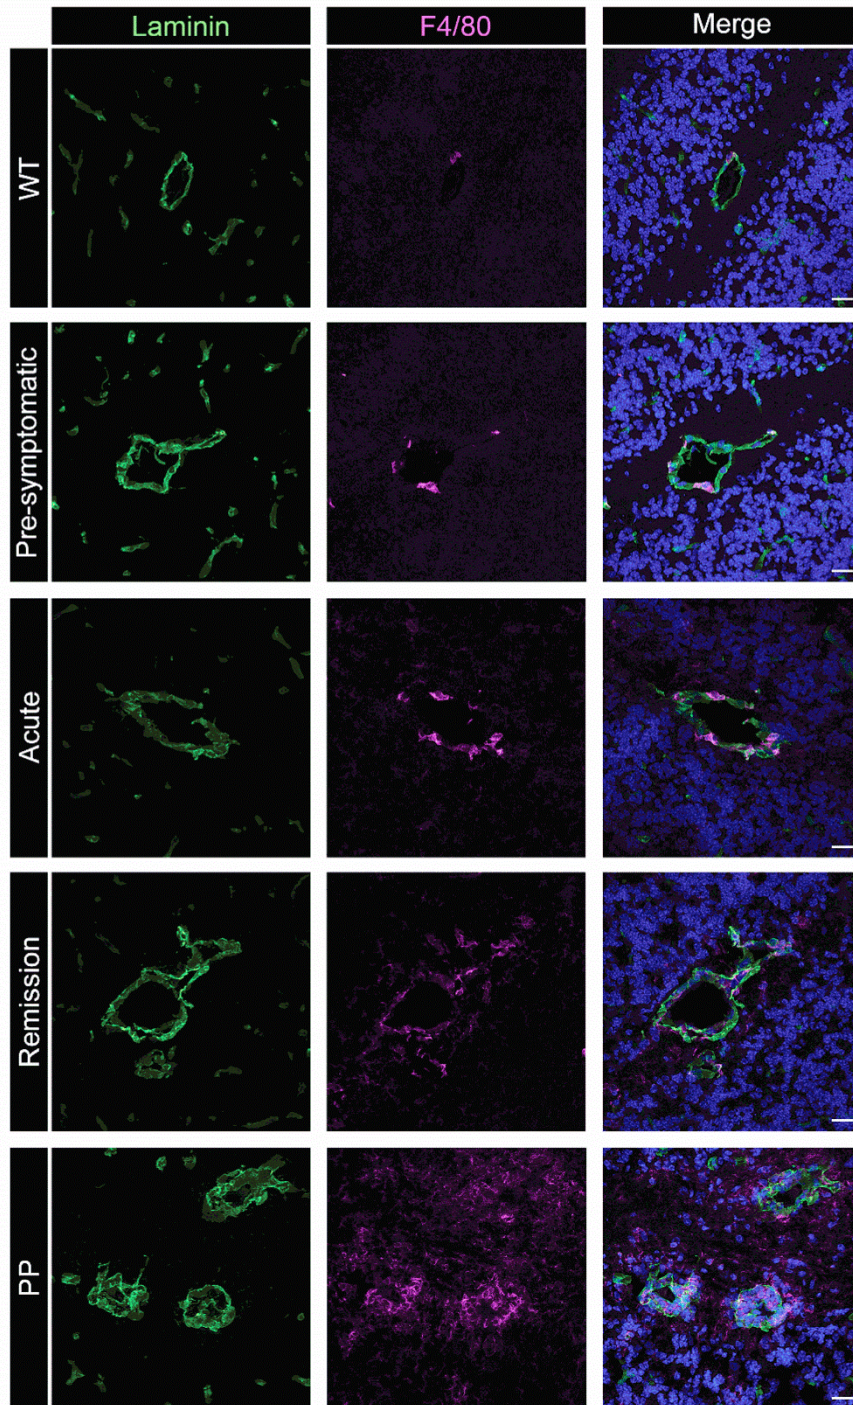

**Supplemental Figure 2. Analysis of the blood-brain barrier integrity at different disease phases in  $TCR^{1640}$  mice.** BBB integrity was measured by immunofluorescent staining for infiltrating macrophages ( $F4/80^+$ ) and activation of the basal membrane (laminin staining) in  $TCR^{1640}$  mice at different disease phases: pre-symptomatic (age day 30-40), acute disease (score  $\geq 3$ ), remissions (recovery of score with  $\Delta 2$ ) and primary progressive disease. Data are representative of at least 3 independent experiments with at least 3  $TCR^{1640}$  mice at the different disease phases. Scale bar: 100  $\mu m$



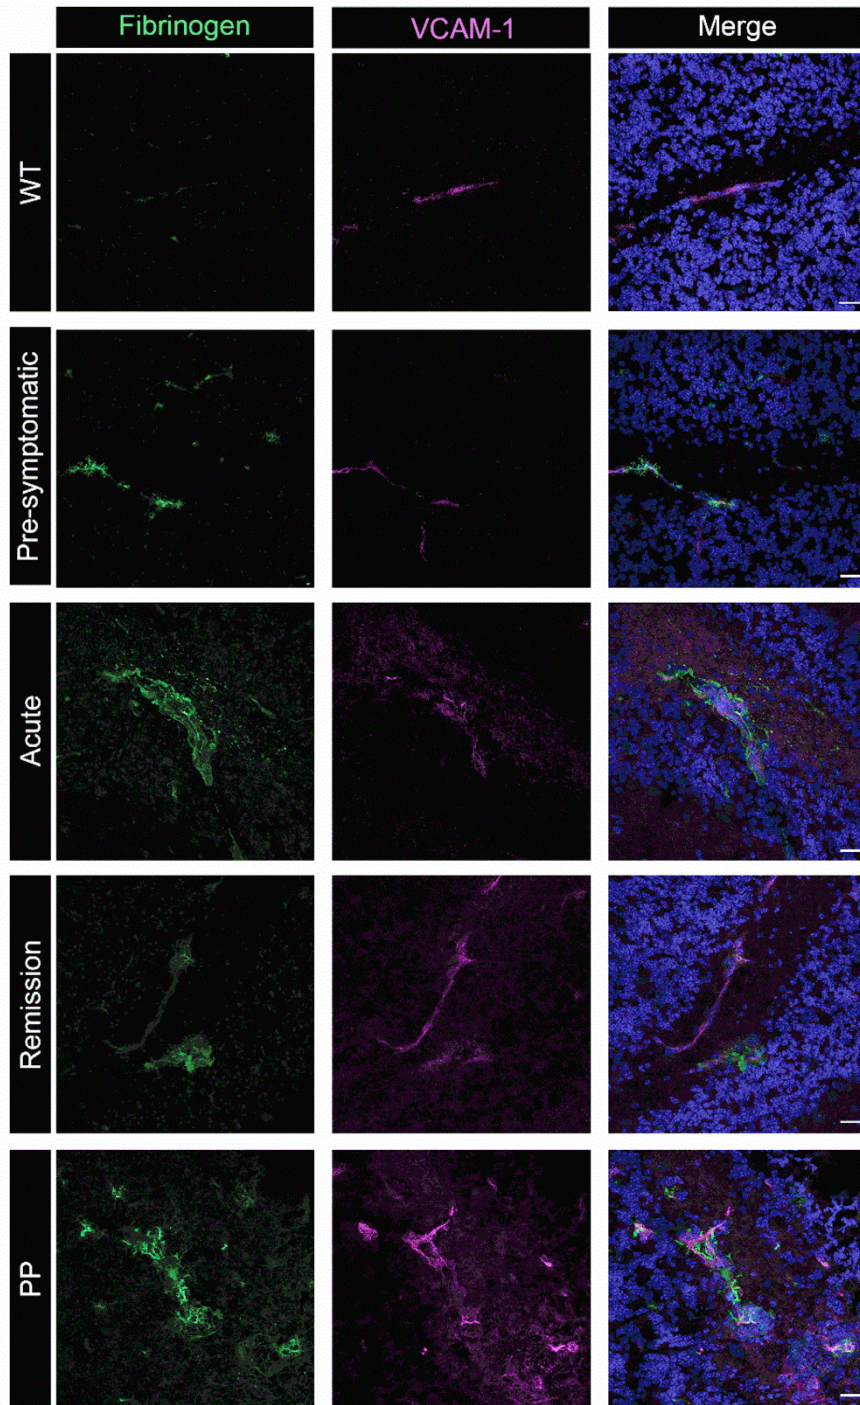

**Supplemental Figure 3. Analysis of the blood-brain barrier integrity at different disease phases in  $TCR^{1640}$  mice.** BBB integrity was measured by immunofluorescent staining for extravasation of blood proteins into the parenchyma (fibrinogen) and activation of adhesion molecules on the BBB (VCAM-1) in  $TCR^{1640}$  mice at different disease phases: pre-symptomatic (age day 30-40), acute disease (score  $\geq 3$ ), remissions (recovery of score with  $\Delta 2$ ) and primary progressive disease. Data are representative of at least 3 independent experiments with at least 3  $TCR^{1640}$  mice at the different disease phases. Scale bar: 100  $\mu m$

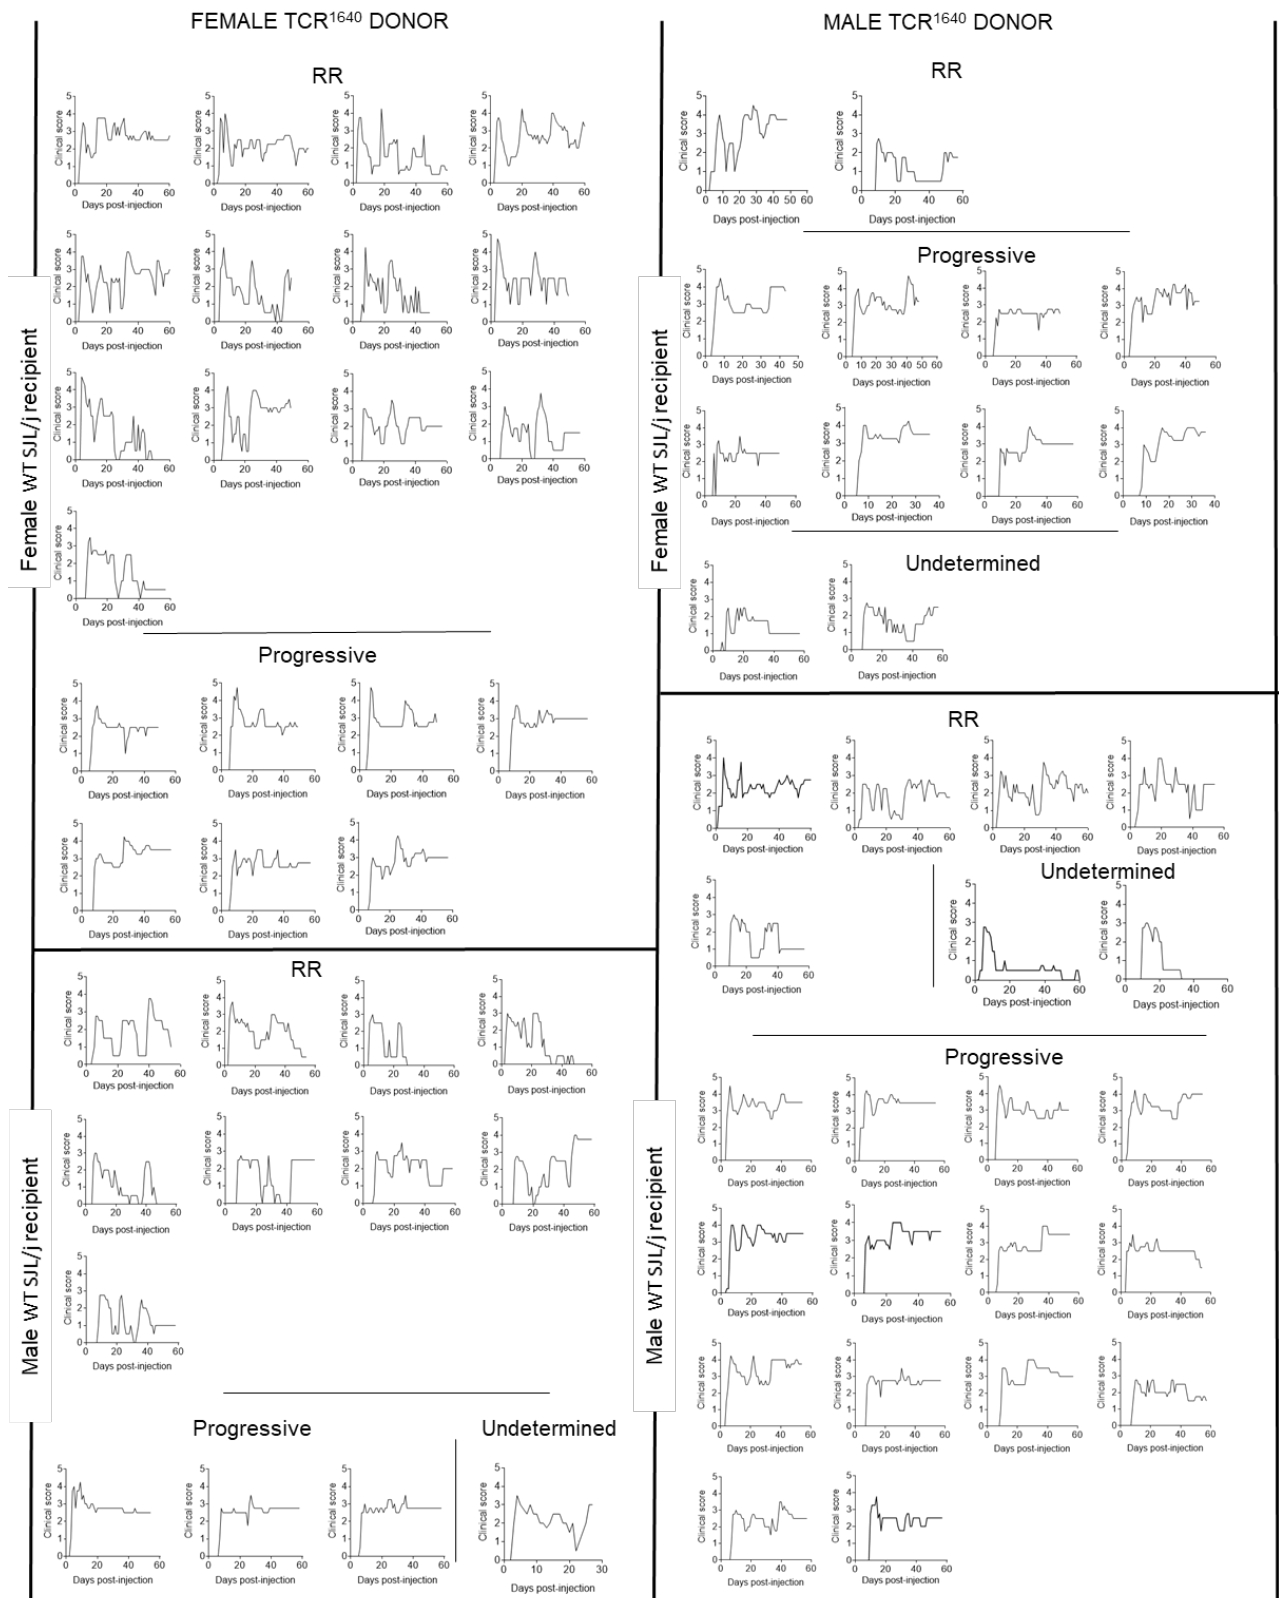

**Supplemental Figure 4.** Graphs of EAE disease course (progressive, relapsing-remitting (RR) or undetermined) after injection of male or female transgenic TCR<sup>1640</sup> cells into male or female WT SJL/j recipient followed for 60 days.



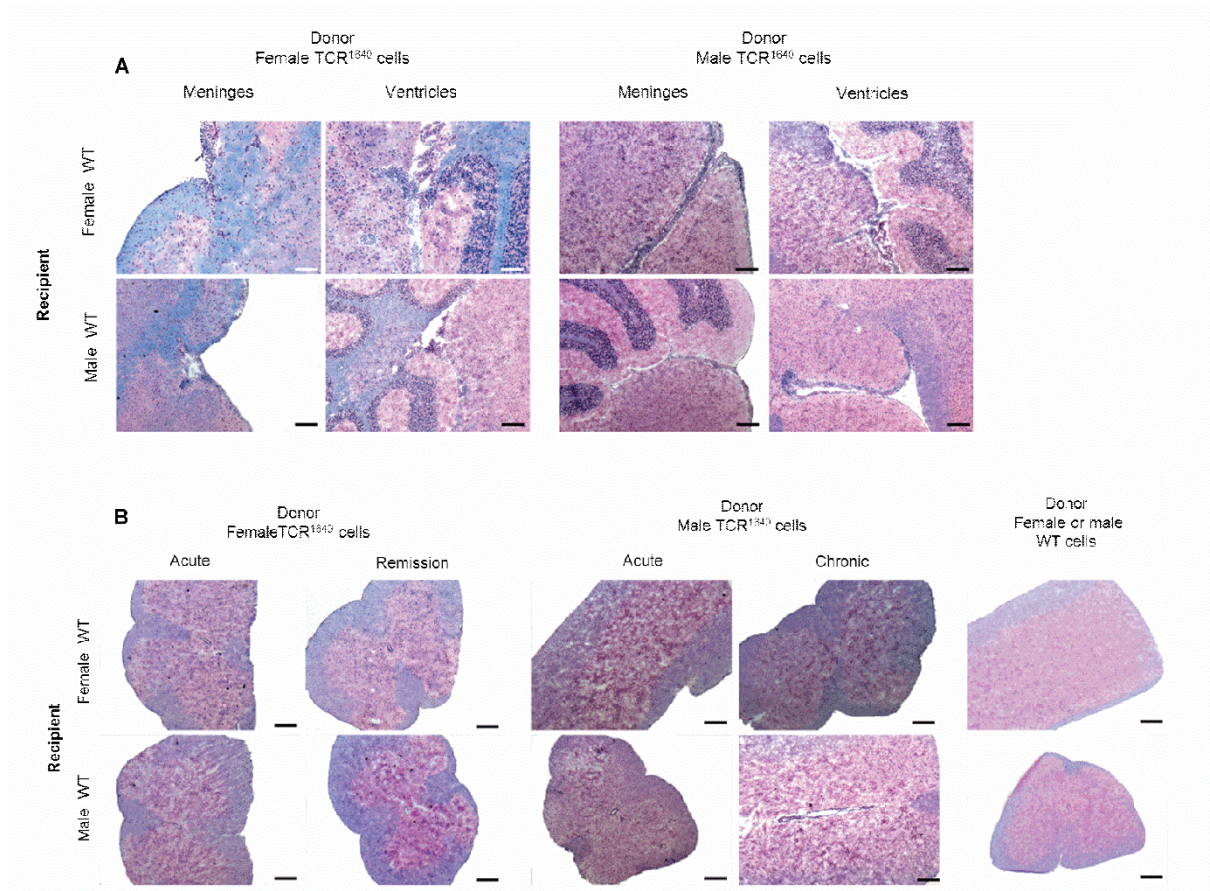

**Supplemental Figure 5. Histological analysis of meninges, ventricles and spinal cord of SJL/j female and male recipients after adoptive transfer.** After injection of female TCR<sup>1640</sup> immune cells, recipients were sacrificed at acute disease (first peak, score  $\geq 3$ ) and during remission (clinical score of  $\Delta \geq 2$ ). After injection of male TCR<sup>1640</sup> immune cells, recipients were sacrificed at acute disease (score  $\geq 3$ ) and during chronic disease (clinical score  $\geq 3$  for more than 20 days). Histological analysis was performed using luxol fast blue for myelin and counterstained by hematoxylin and eosin for cellular infiltrates. **(A)** Representative image of histological analysis of meninges and ventricles of SJL/j female and male recipients after adoptive transfer. **(B)** Representative image of histological analysis of spinal cord of SJL/j female and male recipients after adoptive transfer. Histological analysis of spinal cord of SJL/j female and male mice after injection with SJL/j immune cells were performed as a control (right panel). Data are representative of 3 or more independent experiments with three mice per group. White scale bar: 100  $\mu\text{m}$ ; Black scale bar : scale 250  $\mu\text{m}$ .

**Supplemental table 1: mRNA expression levels (Normalized log2(exp) by sample)**

| <b>GENE</b>     | <b>WT_M1</b> | <b>WT_M2</b> | <b>WT_F1</b> | <b>WT_F2</b> | <b>TCR_F1</b> | <b>TCR_F2</b> | <b>TCR_M1</b> | <b>TCR_M2</b> |
|-----------------|--------------|--------------|--------------|--------------|---------------|---------------|---------------|---------------|
| <b>EXOSC9</b>   | 9,276        | 9,198        | 9,107        | 9,032        | 8,497         | 8,508         | 7,533         | 7,474         |
| <b>GUF1</b>     | 8,917        | 8,860        | 9,147        | 9,042        | 8,612         | 8,483         | 7,414         | 7,286         |
| <b>HSP90B1</b>  | 9,187        | 9,137        | 8,746        | 8,637        | 8,023         | 7,996         | 7,604         | 7,581         |
| <b>AMZ2</b>     | 8,862        | 8,840        | 8,885        | 8,793        | 8,091         | 8,174         | 7,375         | 7,268         |
| <b>CRYBG3</b>   | 9,038        | 9,014        | 8,957        | 8,871        | 8,568         | 8,461         | 8,060         | 7,950         |
| <b>RCCD1</b>    | 8,979        | 8,873        | 8,730        | 8,698        | 8,363         | 8,322         | 7,982         | 7,911         |
| <b>CDK4</b>     | 9,184        | 9,114        | 9,050        | 9,014        | 8,706         | 8,653         | 8,272         | 8,241         |
| <b>AP3M1</b>    | 9,884        | 9,798        | 9,654        | 9,608        | 8,387         | 8,411         | 7,773         | 7,607         |
| <b>ARHGEF12</b> | 9,047        | 9,015        | 9,136        | 9,060        | 10,149        | 10,039        | 9,639         | 9,524         |
| <b>ECHDC1</b>   | 9,210        | 9,215        | 9,295        | 9,277        | 9,657         | 9,572         | 8,909         | 8,857         |
| <b>PMEL</b>     | 8,392        | 8,372        | 8,395        | 8,330        | 9,658         | 9,579         | 9,051         | 9,032         |
| <b>GDI2</b>     | 7,747        | 7,752        | 7,629        | 7,628        | 8,332         | 8,180         | 7,221         | 7,148         |
| <b>SRPK2</b>    | 7,690        | 7,691        | 7,683        | 7,607        | 8,352         | 8,354         | 6,963         | 6,941         |
| <b>GBP2</b>     | 7,662        | 7,574        | 7,469        | 7,386        | 8,096         | 8,036         | 7,195         | 7,135         |
| <b>CCDC66</b>   | 7,717        | 7,583        | 7,595        | 7,498        | 8,076         | 7,939         | 6,790         | 6,802         |
| <b>SNHG14</b>   | 8,259        | 8,170        | 8,200        | 8,158        | 8,667         | 8,574         | 7,492         | 7,454         |
| <b>CTLA4</b>    | 8,338        | 8,298        | 8,032        | 8,033        | 7,333         | 7,314         | 7,014         | 6,940         |
| <b>LCORL</b>    | 7,935        | 7,905        | 7,825        | 7,671        | 7,220         | 7,148         | 6,609         | 6,492         |
| <b>IL17F</b>    | 8,812        | 8,789        | 8,579        | 8,588        | 7,517         | 7,495         | 7,226         | 7,026         |
| <b>DEGS2</b>    | 7,628        | 7,409        | 7,729        | 7,627        | 9,105         | 9,030         | 8,145         | 8,098         |
| <b>RPS11</b>    | 7,327        | 7,270        | 6,952        | 6,967        | 9,012         | 8,915         | 8,667         | 8,597         |
| <b>SYN3</b>     | 10,034       | 9,933        | 9,593        | 9,548        | 5,045         | 4,887         | 4,638         | 4,213         |
| <b>FKBP3</b>    | 7,183        | 7,270        | 7,155        | 7,045        | 7,647         | 7,549         | 6,632         | 6,630         |
| <b>HDGFL3</b>   | 7,381        | 7,303        | 7,024        | 6,963        | 7,580         | 7,395         | 6,576         | 6,450         |
| <b>CCDC39</b>   | 6,638        | 6,603        | 6,810        | 6,720        | 7,258         | 7,310         | 5,985         | 5,961         |
| <b>DGAT1</b>    | 7,432        | 7,322        | 7,217        | 7,237        | 6,695         | 6,611         | 6,013         | 6,061         |
| <b>LILR4B</b>   | 7,211        | 7,191        | 6,807        | 6,814        | 6,164         | 6,158         | 5,770         | 5,419         |
| <b>CDC73</b>    | 7,631        | 7,480        | 7,752        | 7,687        | 6,557         | 6,529         | 5,358         | 5,255         |
| <b>PLEK</b>     | 6,497        | 6,440        | 6,137        | 6,270        | 4,976         | 5,053         | 4,087         | 4,183         |
| <b>SELL</b>     | 5,050        | 4,815        | 4,574        | 4,417        | 7,335         | 7,288         | 6,773         | 6,652         |
| <b>DAGLB</b>    | 10,310       | 10,230       | 10,265       | 10,189       | 9,881         | 9,802         | 9,455         | 9,385         |
| <b>METTL23</b>  | 10,182       | 10,085       | 10,045       | 9,951        | 9,680         | 9,665         | 9,389         | 9,300         |
| <b>ULK4</b>     | 10,047       | 9,981        | 9,955        | 9,832        | 10,221        | 10,140        | 9,383         | 9,298         |
| <b>ACAT3</b>    | 10,813       | 10,792       | 10,706       | 10,679       | 10,279        | 10,226        | 9,781         | 9,720         |
| <b>BYSL</b>     | 10,683       | 10,595       | 10,443       | 10,414       | 10,204        | 10,123        | 9,955         | 9,867         |
| <b>PHYKPL</b>   | 11,937       | 11,867       | 11,931       | 11,857       | 11,269        | 11,205        | 10,895        | 10,844        |
| <b>TMCC1</b>    | 11,573       | 11,509       | 11,433       | 11,386       | 11,080        | 11,026        | 10,652        | 10,584        |
